# Supplementary material for: Effectiveness of a School-Based Multimodal Intervention on Promoting Healthy Lifestyle Behaviours Among Schoolchildren. Previene-Cádiz Study.
Source: Research Square preprint supplement (doi:10.21203/rs.3.rs-5327407/v1), 2024-11-04
Supplement: Supplementary file 1 [file 76c7dc49979e4b95a1506251.xlsx]

## Sheet: Hoja1
			Table 1. Descriptive characteristics of schoolchildren by groups.
			Variable	Pre Total sample n=864			Post Total sample n=833			Delta Total sample n=833			Pre Control group n=364			Post Control group n=364			Delta Control group n=364			Pre Intervention group n=500			Post Intervention group n=469			Delta Intervention group n=469			p-value pre	p-value post	p-value delta
			Physical characteristics
			Age (years)	8.43085	±	0.349317	8.85257	±	0.350333	0.42	±	0.06	8.42665	±	0.361595	8.80986	±	0.363011	0.38	±	0.05	8.43	±	0.33	8.8861	±	0.339731	0.45	±	0.04	0.093	0.002	0
			Weight (kg)	31.4778	±	7.71899	32.9203	±	8.39303	1.49	±	1.72	31.4356	±	7.49366	32.9658	±	8.00262	1.51	±	1.68	31.51	±	7.07	32.8847	±	7.89572	1.47	±	1.75	0.366	0.893	0.727
			Height (cm)	130.676	±	6.03487	132.73	±	6.38173	2.07	±	1.81	131.056	±	5.81932	132.976	±	6.08955	1.92	±	2.13	130.38	±	5.75	132.537	±	6.18619	2.18	±	1.51	0.156	0.337	0.053
			Body mass index (kg/m-2)	18.2819	±	3.40126	18.5057	±	3.5635	0.26	±	0.95	18.1613	±	3.3123	18.4852	±	3.42467	0.32	±	0.92	18.37	±	3.44	18.5218	±	3.46878	0.21	±	0.98	0.705	0.886	0.142
			Body mass index status (%) (UW/NW/OW/Ob)γ	5 / 60 / 22 / 13			6 / 56 / 24 / 14			1 / 97 / 1 / 0			5 / 57 / 24 / 14			6 / 56 / 24 / 15			1 / 98 / 1 / 0			5 / 58 / 23 / 14			6 / 56 / 24 / 13			2 / 96 / 1 / 1			0.994	0.964	0.464
			Self reported physical fitness
			General physical fitness (%) (Bad/Acceptable/Good/Very good)	2 / 15 / 37 / 46			3 / 13 / 32 / 53			0 / 5 / 17 / 48 / 23 / 5 / 1			3 / 16 / 37 / 45			3 / 13 / 34 / 50			5 / 18 / 47 / 24 / 4 / 1			1 / 15 / 38 / 46			3 / 12 / 30 / 55			0 / 5 / 17 / 48 / 23 / 6 / 0			0.422	0.481	0.734
			Cardiorespiratory fitness (%) (Bad/Acceptable/Good/Very good)	7 / 21 / 33 / 39			9 / 18 / 28 / 46			1 / 6 / 19 / 42 / 20 / 9 / 2			7 / 19 / 32 / 42			9 / 16 / 29 / 45			1 / 6 / 20 / 45 / 20 / 7 / 1			6 / 23 / 33 / 37			8 / 19 / 26 / 47			1 / 7 / 19 / 40 / 20 / 10 / 3			0.548	0.671	0.31
			Muscular strength (%) (Bad/Acceptable/Good/Very good)	3 / 19 / 33 / 45			4 / 16 / 31 / 49			1 / 5 / 17 / 48 / 23 / 5 / 1			4 / 17 / 33 / 47			5 / 14 / 31 / 50			1 / 6 / 16 / 50 / 22 / 4 / 1			3 / 21 / 32 / 44			4 / 17 / 30 / 49			1 / 4 / 18 / 47 / 23 / 6 / 1			0.581	0.569	0.694
			Speed/Agility (%) (Bad/Acceptable/Good/Very good)	4 / 15 / 30 / 51			3 / 13 / 29 / 54			0 / 3 / 16 / 55 / 20 / 5 / 1			3 / 18 / 30 / 49			3 / 12 / 32 / 53			0 / 3 / 16 / 54 / 22 / 4 / 0			5 / 13 / 30 / 52			3 / 14 / 26 / 56			0 / 4 / 16 / 55 / 19 / 5 / 1			0.175	0.328	0.8
			Flexibility (%) (Bad/Acceptable/Good/Very good)	14 / 24 / 25 / 37			19 / 24 / 23 / 34			2 / 7 / 20 / 48 / 15 / 6 / 1			12 / 25 / 24 / 38			18 / 23 / 24 / 35			2 / 5 / 23 / 48 / 15 / 5 / 2			14 / 24 / 26 / 36			19 / 24 / 22 / 34			2 / 9 / 18 / 48 / 15 / 6 / 1			0.812	0.878	0.398
			Feeding (children reported)
			Breakfast (%) (Yes/No)	91 / 9			92 / 8			5 / 90 / 4			91 / 9			93 / 7			5 / 92 / 3			91 / 9			91 / 9			5 / 90 / 5			0.703	0.269	0.625
			To eat in a restaurant (%) (Always/Many times/Sometimes/Never)	2 / 28 / 64 / 6			1 / 23 / 67 / 10			1 / 14 / 59 / 23 / 2			2 / 26 / 65 / 7			1 / 22 / 67 / 9			2 / 15 / 58 / 23 / 2			2 / 29 / 63 / 6			1 / 23 / 66 / 10			1 / 13 / 60 / 23 / 2 / 0			0.68	0.853	0.635
			Feeding (parents reported)
			Breakfast (%) (Always/Many times/Sometimes/Never)	86 / 6 / 5 / 3			86 / 5 / 5 / 4			1 / 2 / 5 / 85 / 5 / 3 / 0			85 / 7 / 5 / 2			87 / 4 / 4 / 5			1 / 2 / 5 / 82 / 6 / 3 / 0			86 / 5 / 6 / 3			86 / 5 / 5 / 4			1 / 1 / 5 / 87 / 4 / 2 / 0			0.341	0.592	0.626
			To eat in a restaurant (%) (Never/Sometimes/Many times/Always)	30 / 67 / 2 / 1			28 / 70 / 2 / 0			13 / 74 / 13			36 / 62 / 2 / 0			34 / 66 / 0 / 0			15 / 70 / 15			26 / 71 / 3 / 0			24 / 73 / 3 / 0			11 / 77 / 11			0.013	0.001	0.099
			Screen time (children reported)
			TV and VG weekdays (%) (Less 2h day/Between 2-4h day/More 4h day)	61 / 23 / 16			70 / 21 / 9			9 / 18 / 58 / 13 / 2			61 / 22 / 17			69 / 22 / 9			9 / 17 / 59 / 12 / 2			60 / 24 / 16			70 / 21 / 9			9 / 19 / 57 / 14 / 2			0.891	0.842	0.935
			TV and VG weekends (%) (Less 2h day/Between 2-4h day/More 4h day)	46 / 28 /26			49 / 31 /20			8 / 19 / 54 / 15 / 4			46 / 29 / 25			52 / 29 / 19			7 / 20 / 56 / 14 / 3			45 / 27 / 28			46 / 33 / 21			8 / 18 / 53 / 16 / 5			0.727	0.238	0.601
			PC and MP weekdays (%) (Less 2h day/Between 2-4h day/More 4h day)	72 / 17 / 11			75 / 16 / 9			5 / 13 / 69 / 10 / 3			71 / 19 / 10			75 / 18 / 8			4 / 13 / 69 / 10 / 3			71 / 16 / 12			76 / 14 / 10			5 / 13 / 68 / 11 / 3			0.439	0.276	0.98
			PC and MP weekends (%) (Less 2h day/Between 2-4h day/More 4h day)	60 / 21 / 19			60 / 25 / 15			8 / 14 / 58 / 14 / 5			61 / 24 / 15			64 / 22 / 14			7 / 15 / 60 / 12 / 6			59 / 20 / 21			57 / 27 / 15			9 / 14 / 56 / 16 / 5			0.061	0.124	0.602
			Screen time (parents reported)
			TV weekdays (%) (Less 2h day/Between 2-4h day/More 4h day)	89 / 10 / 1			89 / 10 / 1			8 / 85 / 7 / 0			89 / 9 / 2			89 / 9 / 1			6 / 88 / 6			88 / 11 / 1			88 / 11 / 1			9 / 82 / 8 / 1			0.628	0.82	0.148
			TV weekends (%) (Less 2h day/Between 2-4h day/More 4h day)	64 / 33 / 3			66 / 30 / 5			1 / 16 / 68 / 13 / 1			65 / 31 / 4			62 / 33 / 5			0 / 14 / 70 / 14 / 2			62 / 35 / 3			68 / 27 / 4			1 / 18 / 67 / 13 / 1			0.436	0.228	0.59
			VG weekdays (%) (Less 2h day/Between 2-4h day/More 4h day)	97 / 2 / 1			96 / 3 / 0			0 / 2 / 95 / 3 / 0			97 / 3 / 0			96 / 3 / 0			0 / 1 / 96 / 2			97 / 2 / 1			96 / 3 / 0			0 / 2 / 95 / 3 / 0			0.87	0.984	0.918
			VG weekends (%) (Less 2h day/Between 2-4h day/More 4h day)	85 / 13 / 2			85 / 14 / 1			1 / 8 / 81 / 9			87 / 10 / 2			88 / 11 / 1			1 / 7 / 84 / 8			83 / 14 / 2			83 / 16 / 1			1 / 9 / 79 / 10			0.259	0.127	0.402
			PC and MP weekdays (%) (Less 2h day/Between 2-4h day/More 4h day)	97 / 2 / 1			97 / 3 / 0			0 / 2 / 96 / 2			96 / 3 / 1			97 / 2 / 1			0 / 2 / 95 / 2			98 / 2 / 0			97 / 3 / 0			0 / 1 / 97 / 2			0.364	0.254	0.429
			PC and MP weekends (%) (Less 2h day/Between 2-4h day/More 4h day)	86 / 12 / 2			85 / 13 / 2			1 / 8 / 83 / 8 / 1			86 / 12 / 2			85 / 14 / 2			1 / 8 / 82 / 9 / 1			86 / 12 / 2			85 / 13 / 2			1 / 8 / 83 / 7 / 1			0.91	0.782	0.974
			Hours of sleep
			Weekdays (h/day)	10.0139	±	0.572889	10.0117	±	0.567229	0.011	±	0.71	10.04	±	0.571323	10.0352	±	0.560579	0.001	±	0.76	9.99	±	0.58	9.99329	±	0.572465	0.02	±	0.67	0.745	0.342	0.777
			Weekends (h/day)	10.4019	±	0.905684	10.4019	±	0.903163	-0.008	±	1.16	10.4903	±	0.938022	10.474	±	0.935053	-0.5	±	1.35	10.33	±	0.83	10.3455	±	0.874582	0.02	±	0.98	0.842	0.07	0.464
			Weekdays (%) (Less 9h day/Between 9-12h day/More 12h day)	2 / 98 / 0			8 / 85 / 7			7 / 80 / 12 / 1			8 / 90 / 2			8 / 85 / 7			9 / 76 / 14 / 1			8 / 91 / 1			8 / 85 / 6			5 / 83 / 11 / 1			0.158	0.932	0.229
			Weekends (%) (Less 9h day/Between 9-12h day/More 12h day)	2 / 96 / 2			8 / 59 / 32			1 / 14 / 57 / 26 / 2			7 / 76 / 17			7 / 58 / 35			1 / 16 / 52 / 27 / 3			10 / 77 / 13			9 / 60 / 31			12 / 61 / 26 / 1			0.277	0.369	0.039
			Parent´s educational level
			Father´s educational level (%) (Primary/Secondary/Higher studies)	9 / 65 / 26			9 / 65 / 26			4 / 92 / 4 / 0			8 / 66 / 25			10 / 65 / 25			4 / 93 / 3			8 / 64 / 28			8 / 64 / 28			4 / 91 / 4 / 0			0.81	0.443	0.534
			Mother´s educational level (%) (Primary/Secondary/Higher studies)	7 / 61 / 32			7 / 60 / 33			3 / 94 / 3 / 0			7 / 61 / 32			8 / 59 / 33			3 / 94 / 3			7 / 60 / 33			7 / 60 / 33			3 / 94 / 3 / 0			0.953	0.808	0.845
			Lifestyle behaviour score
			Score_lifestyle_behaviors5_2 (%) (0/1/2/3/4)	48 / 36 / 12 / 2 / 0			50 / 38 / 10 / 1 / 0			4 / 22 / 52 / 18 / 3			50 / 37 / 12 / 1 / 0			47 / 41 / 10 / 1 / 0			1 / 3 / 20 / 53 / 19 / 3 / 1			48 / 36 / 13 / 3 / 0			53 / 36 / 11 / 1 / 0			4 / 23 / 52 / 18 / 2			0.597	0.482	0.714
			Score_lifestyle_behaviors5_2_3Categorías (%) (Good/Regular/Bad)	48 / 49 / 3			50 / 49 / 1			1 / 20 / 63 / 16 / 0			50 / 49 / 1			47 / 51 / 2			1 / 17 / 63 / 18 / 1			48 / 49 / 3			53 / 47 / 0			0 / 21 / 63 / 15			0.345	0.368	0.544
			Values are presented as mean ± standard deviation or percentages. T-test and γChi square statistics was applied. Statistically significant differences between groups are highlighted in bold. MP means mobile phone; NW, normal weight; Ob, obesity; OW, overweight; PC, personal computer; UN, underweight; VG, video games.
			Hacer una tabla con las columnas señaladas
			Hacer una segunda tabla con el post (columnas que no están señaladas)

## Sheet: Hoja2
	Table 1. Descriptive characteristics of the schoolchildren pre-intervention, post-intervention and delta by groups.
		Total Sample			Control Group			Intervention Group			p-value*
	Variable	Pre n=864	Post n=833	Delta n=833	Pre	Post	Delta	Pre	Post	Delta	Pre	Post	Delta
					n=364	n=364	n=364	n=469	n=469	n=469
	Physical characteristics	Mean (SD) or Percentage
	Age (years)	8.43 ± 0.35	8.85 ± 0.35	0.42 ± 0.06	8.43 ± 0.36	8.81 ± 0.36	0.38 ± 0.05	8.43 ± 0.34	8.88 ± 0.34	0.45 ± 0.04	0.57	<0.001	<0.001
	Weight (kg)	31.48 ± 7.72	32.92 ± 8.39	1.49 ± 1.72	31.44 ± 7.49	32.97 ± 8.00	1.51 ± 1.68	31.51 ± 7.89	32.88 ± 8.69	1.47 ± 1.75	0.79	0.474	0.454
	Height (cm)	130.68 ± 6.03	132.73 ± 6.38	2.07 ± 1.81	131.06 ± 5.82	132.97 ± 6.09	1.92 ± 2.13	130.38 ± 6.19	132.54 ± 6.60	2.18 ± 1.51	0,094	0.307	<0.001
	Body mass index (kg/m-2)	18.28 ± 3.40	18.51 ± 3.56	0.26 ± 0.95	18.16 ± 3.31	18.48 ± 3.42	0.32 ± 0.92	18.37 ± 3.47	18.52 ± 3.67	0.21 ± 0.98	0.476	0.941	0.048
	Body mass index status (%) (UW/NW/OW/Ob)γ	5 / 60 / 22 / 13	6 / 56 / 24 / 14	NA	5 / 57 / 24 / 14	6 / 56 / 24 / 15	NA	5 / 58 / 23 / 14	6 / 56 / 24 / 13	NA	0.994	0.969	NA
	Triceps skinfold (mm)	14.67 ± 6.20	14.96 ± 6.30	0.37 ± 2.35	14.65 ± 6.21	14.92 ± 6.27	0.28 ± 2.22	14.68 ± 6.20	14.98 ± 6.32	0.44 ± 2.45	0.934	0.948	0.314
	Subscapular skinfold (mm)	10.40 ± 7.12	10.69 ± 7.74	0.42 ± 2.45	10.28 ± 6.64	10.52 ± 7.28	0.27 ± 2.39	10.50 ± 7.48	10.83 ± 8.09	0.54 ± 2.48	0.334	0.87	0.036
	Waist circumference (cm)	63.32 ± 9.58	63.82 ± 10.17	0.62 ± 3.24	63.28 ± 9.52	64.44 ± 10.15	1.16 ± 3.29	63.36 ± 9.63	63.33 ± 10.16	0.20 ± 3.14	0.988	0.052	<0.001
	Hip circumference (cm)	72.14 ± 8.09	73.68 ± 8.35	1.62 ± 2.44	72.42 ± 7.89	73.63 ± 8.12	1.21 ± 2.56	71.92 ± 8.24	73.72 ± 8.52	1.94 ± 2.29	0.216	0.865	<0.001
	Waist to hip ratio	0.87 ± 0.05	0.86 ± 0.06	-0.01 ± 0.04	0.87 ± 0.06	0.87 ± 0.57	0.0007 ± 0.42	0.88 ± 0.05	0.86 ± 0.06	-0.02 ± 0.04	0.063	<0.001	<0.001
	Waist to height ratio	0.48 ± 0.06	0.48 ± 0.07	-0.003 ± 0.02	0.48 ± 0.06	0.48 ± 0.07	0.002 ± 0.03	0.48 ± 0.06	0.48 ± 0.06	-0.006 ± 0.02	0.479	0.145	<0.001
	Self reported physical fitness (children reported)
	General physical fitness (%) (B/A/G/VG)	2 / 15 / 37 / 46	3 / 13 / 32 / 53	NA	3 / 16 / 37 / 45	3 / 13 / 34 / 50	NA	1 / 15 / 38 / 46	3 / 12 / 30 / 55	NA	0.422	0.481	NA
	Cardiorespiratory fitness (%) (B/A/G/VG)	7 / 21 / 33 / 39	9 / 18 / 28 / 46	NA	7 / 19 / 32 / 42	9 / 16 / 29 / 45	NA	6 / 23 / 33 / 37	8 / 19 / 26 / 47	NA	0.548	0.671	NA
	Muscular strength (%) (B/A/G/VG)	3 / 19 / 33 / 45	4 / 16 / 31 / 49	NA	4 / 17 / 33 / 47	5 / 14 / 31 / 50	NA	3 / 21 / 32 / 44	4 / 17 / 30 / 49	NA	0.581	0.569	NA
	Speed/Agility (%) (B/A/G/VG)	4 / 15 / 30 / 51	3 / 13 / 29 / 54	NA	3 / 18 / 30 / 49	3 / 12 / 32 / 53	NA	5 / 13 / 30 / 52	3 / 14 / 26 / 56	NA	0.175	0.328	NA
	Flexibility (%) (B/A/G/VG)	14 / 24 / 25 / 37	19 / 24 / 23 / 34	NA	12 / 25 / 24 / 38	18 / 23 / 24 / 35	NA	14 / 24 / 26 / 36	19 / 24 / 22 / 34	NA	0.812	0.878	NA
	Physical activity (children reported)
	Weekly family physical activity days	2.27 ± 2.05	2.37 ± 2.03	0.11 ± 2.37	2.32 ± 2.09	2.14 ± 1.93	-0.20 ± 2.26	2.23 ± 2.01	2.55 ± 2.09	0.35 ± 2.43	0.673	0.004	0.002
	School transportation mode (%) (AD/PD)	40 / 60	42 / 58	NA	51 / 49	47 / 53	NA	37 / 63	41 / 59	NA	0.255	0.009	NA
	Eating behaviours (children reported)
	Feeding beliefs and knowledge index (%) (Nk/Lk/Sk/Gk/VGk/Ek)	4 / 15 / 28 / 34 / 17 / 2	3 / 11 / 28 / 35 / 20 / 3	NA	4 / 10 / 27 / 36 / 21 / 2	4 / 11 / 27 / 36 / 18 / 3	NA	4 / 18 / 29 / 32 / 15 / 3	3 / 11 / 28 / 34 / 22 / 3	NA	0.023	0.843	NA
	Breakfast (%) (Yes/No)	91 / 9	92 / 8	NA	91 / 9	93 / 7	NA	91 / 9	91 / 9	NA	0.878	0.269	NA
	Fast food consumption (%) (Al/MT/S/N)	2 / 28 / 64 / 6	1 / 23 / 67 / 10	NA	2 / 26 / 65 / 7	1 / 22 / 67 / 9	NA	2 / 29 / 63 / 6	1 / 23 / 66 / 10	NA	0.266	0.044	NA
	Screen time (children reported)
	TV and VG weekdays (%) (<2h/2–4h/>4h)	61 / 23 / 16	70 / 21 / 9	NA	61 / 22 / 17	69 / 22 / 9	NA	60 / 24 / 16	70 / 21 / 9	NA	0.891	0.842	NA
	TV and VG weekends (%) (<2h/2–4h/>4h)	46 / 28 /26	49 / 31 /20	NA	46 / 29 / 25	52 / 29 / 19	NA	45 / 27 / 28	46 / 33 / 21	NA	0.727	0.238	NA
	PC and MP weekdays (%) (<2h/2–4h/>4h)	72 / 17 / 11	75 / 16 / 9	NA	71 / 19 / 10	75 / 18 / 8	NA	71 / 16 / 12	76 / 14 / 10	NA	0.439	0.276	NA
	PC and MP weekends (%) ((<2h/2–4h/>4h)	60 / 21 / 19	60 / 25 / 15	NA	61 / 24 / 15	64 / 22 / 14	NA	59 / 20 / 21	57 / 27 / 15	NA	0.061	0.124	NA
	Screen time (parents reported)
	TV weekdays (%) (<2h/2–4h/>4h)	89 / 10 / 1	89 / 10 / 1	NA	89 / 9 / 2	89 / 9 / 1	NA	88 / 11 / 1	88 / 11 / 1	NA	0.628	0.82	NA
	TV weekends (%) (<2h/2–4h/>4h)	64 / 33 / 3	66 / 30 / 5	NA	65 / 31 / 4	62 / 33 / 5	NA	62 / 35 / 3	68 / 27 / 4	NA	0.436	0.228	NA
	Vg weekdays (%) (<2h/2–4h/>4h)	97 / 2 / 1	96 / 3 / 0	NA	97 / 3 / 0	96 / 3 / 0	NA	97 / 2 / 1	96 / 3 / 0	NA	0.87	0.984	NA
	Vg weekends (%) (<2h/2–4h/>4h)	85 / 13 / 2	85 / 14 / 1	NA	87 / 10 / 2	88 / 11 / 1	NA	83 / 14 / 2	83 / 16 / 1	NA	0.259	0.127	NA
	PC and MP weekdays (%) (<2h/2–4h/>4h)	97 / 2 / 1	97 / 3 / 0	NA	96 / 3 / 1	97 / 2 / 1	NA	98 / 2 / 0	97 / 3 / 0	NA	0.364	0.254	NA
	PC and MP weekends (%) (<2h/2–4h/>4h)	86 / 12 / 2	85 / 13 / 2	NA	86 / 12 / 2	85 / 14 / 2	NA	86 / 12 / 2	85 / 13 / 2	NA	0.91	0.782	NA
	Hours of sleep
	Weekdays (h/day)	10.01 ± 0.57	10.01 ± 0.57	0.011 ± 0.71	10.04 ± 0.58	10.03 ± 0.56	0.002 ± 0.76	9.98 ± 0.57	10.00 ± 0.55	0.02 ± 0.67	0.273	0.495	0.682
	Weekends (h/day)	10.40 ± 0.91	10.40 ± 0.90	-0.008 ± 1.16	10.51 ± 0.97	10.47 ± 0.93	-0.05 ± 1.35	10.30 ± 0.85	10.32 ± 0.85	0.02 ± 0.98	0.055	0.147	0.377
	Weekdays (%) (<9h/9–11h/>11h)	2 / 98 / 0	8 / 85 / 7	NA	8 / 90 / 2	8 / 85 / 7	NA	8 / 91 / 1	8 / 85 / 6	NA	0.158	0.932	NA
	Weekends (%) (<9h/9–11h/>11h)	2 / 96 / 2	8 / 59 / 32	NA	7 / 76 / 17	7 / 58 / 35	NA	10 / 77 / 13	9 / 60 / 31	NA	0.277	0.369	NA
	Parent´s educational level
	Father´s educational level (%) (PS/SS/HS)	9 / 65 / 26	9 / 65 / 26	NA	8 / 66 / 25	10 / 65 / 25	NA	8 / 64 / 28	8 / 64 / 28	NA	0.81	0.443	NA
	Mother´s educational level (%) (PS/SS/HS)	7 / 61 / 32	7 / 60 / 33	NA	7 / 61 / 32	8 / 59 / 33	NA	7 / 60 / 33	7 / 60 / 33	NA	0.953	0.808	NA
	Lifestyle behaviour score
	Lifestyle behaviours score (%) (G/R/B)	48 / 49 / 3	50 / 49 / 1	NA	50 / 49 / 1	47 / 51 / 2	NA	48 / 49 / 3	53 / 47 / 0	NA	0.345	0.368	NA
	Values are presented as mean ± standard deviation or percentages. Mann Whitney U tests and γChi square statistics was applied. Statistically significant differences between groups are highlighted in bold. Abbreviations: A, acceptable; AD, active displacement; Al, always; B, bad; BMI, body mass index; Cm, centimetres; Ek, excellent knowledge; G, good; Gk, good knowledge; h/day, hours per day; HS, …
